# Supplementary material for: Methane releases across the Laptev Sea signaled by time-integrated biomarkers of aerobic methane oxidation
Source: Copernicus journal article supplement (doi:10.5194/egusphere-2025-4756), 2025-10-06
Supplement: Supplementary file 1 [file eriksson-2025-biomarker.xlsx]

## Sheet: README
# This is the supplement to Eriksson et al., 2025
Sheet #Hopanoids
- Includes concentrations of biomarkers and their stable carbon isotopes
Sheet #CH4 concentrations
- Includes dissolved CH4 concentrations in the water column
Sheet #16s rRNA
-Includes the relative abundance of hopanoid producers (including MOB and non-methanotrophs)
-For information of species distribution, see Supplementary figures 1 and 2
Sheet #Hopanoid producers
-Includes a list of all non-methanotrophic producers that were searched for based on literature review
-For information of species distribution, see Supplementary figures 1 and 2
Literature references
Sinninghe Damsté et al. (2017): Sinninghe Damsté JS, Rijpstra WIC, Dedysh SN, Foesel BU and Villanueva L: Pheno- and genotyping of hopanoid production in Acidobacteria. Frontiers in Microbiology 8-2017. https://doi.org/10.3389/fmicb.2017.00968
LOTUS – the national products occurrence database: LOTUS online. https://lotus.naturalproducts.net

## Sheet: Hopanoids
Sample	Station ID	Water depth (m)	Organic Carbon (%)	δ13C-OC	Lat	Lon	Neohop-13(18)-ene (µg/gOC)	Hop-17(21)-ene (µg/gOC)	Diploptene (µg/gOC)	C30-hopenes (µg/gOC)	δ13C-Hop-17(21)-ene (‰)	δ13C-Neohop-13(18)-ene (‰)	δ13C-Diploptene (‰)	δ13C-Diplopterol (‰)	δ13C-C30-hopenes (‰)
AMK82-6945/1-2 cm	45	150	1.50207	-24.5967	77.1002	126.48	1.44277	1.63807	3.01144	6.09229	-56.1052		-51.3084		-53.7068
AMK82-6947/1-2 cm	47	75	1.07823	-23.9117	76.7756	125.825	4.78535	5.61447	22.8241	33.224	-55.9165	-46.2939	-56.7382	-55.8446	-52.9829
AMK82-6948/1-2 cm	48	74	1.59492	-23.3527	76.7779	125.819	5.33532	5.45719	10.5496	21.3421	-58.6249	-54.4915	-59.5039	-60.3953	-57.5401
AMK82-6950/1-2 cm	50	70	0.872023	-23.7897	76.8798	127.017	6.22685	7.90103	29.1515	43.2794	-54.9519	-53.2139	-58.1305	-57.4993	-55.4321
AMK82-6952/1-2 cm	52	63	0.548409	-24.2997	76.8901	127.792	5.32955	8.31441	49.7347	63.3786	-56.4062	-48.4392	-58.4669	-60.9704	-54.4374
AMK82-6953/1-2 cm	53	68	0.701742	-24.0917	76.8946	127.818	4.85155	5.99011	29.4985	40.3402	-58.0685	-50.3975	-59.2142		-55.8934
AMK82-6955/1-2 cm	55	72	1.08938	-23.7584	76.9222	127.952	1.97388	4.63037	17.061	23.6653	-52.8021		-48.3364	-52.5555	-50.5692
AMK82-6956/1-2 cm	56	79	0.930829	-23.7467	76.998	128.234	5.28917	7.10115	21.9301	34.3204	-46.8765	-42.1992	-51.0182	-52.736	-46.698
AMK82-6957/1-2 cm	57	90	0.445975	-23.3374	77.1022	128.762	6.12857	10.2228	61.7739	78.1253			-56.1892		-56.1892
AMK82-6958/1-2 cm	58	70	0.91501	-23.9717	77.2534	129.493	11.6101	10.3324	31.0876	53.0301	-56.5975	-55.4569	-56.9825	-53.1165	-56.3456
AMK82-6959/1-2 cm	59	76	0.897633	-23.4204	77.6329	131.195	1.46704	3.06767	12.2467	16.7814	-45.4676		-39.8535	-44.0383	-42.6605
AMK82-6973/1-2 cm	73	17	2.2704	-26.5064	72.0115	130.326	1.03337	1.30381	7.15561	9.49278	-40.0162		-34.1018		-37.059
AMK82-6974/1-2 cm	74	13	0.580125	-25.9554	72.4839	130.421	0.412333	1.42107	4.89857	6.73197			-37.9766		-37.9766
AMK82-6975/1-2 cm	75	13	1.45734	-26.8104	72.4824	130.536	1.16443	2.07194	14.4851	17.7215	-37.0622		-37.4829		-37.2726
AMK82-6976/1-2 cm	76	25	2.17369	-26.1004	73.1132	130.367	2.40365	5.21966	13.2167	20.84
AMK82-6978/1-2 cm	78	22	0.935708	-26.1004	73.0921	130.279	2.78765	5.45534	29.0017	37.2447	-42.7539		-38.4262		-40.5901
AMK82-6979/1-2 cm	79	22	0.471709	-25.3124	73.4677	130.067	1.70003	3.21539	9.82633	14.7417	-47.8945		-40.1918		-44.0432
AMK82-6980/1-2 cm	80	17	0.151227	-24.3654	73.9917	130.067		2.55489	3.82572	6.38061				-29.0177
AMK82-6981/1-2 cm	81	34	0.765985	-25.5884	74.5128	130.061	2.79579	5.32686	7.76309	15.8857	-42.0944	-44.9781	-43.0894	-32.4292	-43.3873
AMK82-6983/1-2 cm	83	42	1.57595	-25.8444	75.0375	130.073	1.3188	2.03863	4.67322	8.03064	-42.1788		-40.458	-36.9418	-41.3184
AMK82-6984/1-2 cm	84	61	1.23512	-24.9184	75.5621	130.075	2.01631	4.04548	3.22691	9.2887	-40.9958	-38.6278	-39.2245	-31.3967	-39.616
AMK82-6985/1-2 cm	85	54	1.04619	-24.3147	76.0874	130.071	1.36728	1.4232	5.98795	8.77843			-43.6859	-33.773	-43.6859
AMK82-6986/1-2 cm	86	65	1.20393	-24.0717	76.615	130.073	5.87235	8.11192	28.2379	42.2221	-55.8682	-48.9002	-58.1622	-40.4068	-54.3102
AMK82-6991/1-2 cm	91	56	0.542084	-23.8507	76.3949	125.421	5.51902	7.72305	26.8403	40.0823	-50.7615	-49.0502	-52.8159		-50.8759
AMK82-6992/1-2 cm	92	52	0.459036	-24.1917	76.3943	125.427	4.49555	3.08934	6.17578	13.7607			-54.4629		-51.4629

## Sheet: CH4 concentrations
Station ID	Lat	Lon	Sample depth (m)	CH4 (nM)	Below pycnocline (Yes/No)
47	76.7758	125.828	68.5	3136.88	Yes
47	76.7758	125.828	50.1	2342.05	Yes
47	76.7758	125.828	39.4	1178.13	Yes
47	76.7758	125.828	69.7	4641.75	Yes
47	76.7758	125.828	3.3	89.028	No
47	76.7744	125.843	69.2	1131.03	Yes
47	76.7743	125.843	69.2	1252.19	Yes
47	76.7744	125.842	69.3	1333.27	Yes
47	76.7753	125.834	70.8	1404.67	Yes
47	76.7756	125.832	69.9	1703.43	Yes
47	76.7761	125.828	69.9	1835.41	Yes
47	76.7762	125.827	69.3	2283.7	Yes
47	76.7762	125.827	69.3	2283.7	Yes
47	76.7765	125.825	69.9	2259.59	Yes
47	76.7765	125.825	69.6	2118.06	Yes
47	76.7768	125.824	69.1	1918.59	Yes
47	76.7768	125.823	69.8	2506.95	Yes
47	76.777	125.822	69	2531.33	Yes
47	76.7758	125.828	72.5	11853	Yes
48	76.7778	125.821	69.3	3022.49	Yes
48	76.7778	125.821	51	2031.67	Yes
48	76.7778	125.821	70.5	1610.72	Yes
48	76.7778	125.821	69.3	84.0963	Yes
48	76.7778	125.821	3.1	68.8271	No
50	76.8798	127.016	67.6	84.0963	Yes
50	76.8798	127.016	46.6	87.5974	Yes
50	76.8798	127.016	67.5	70.919	Yes
50	76.8798	127.016	3.3	43.7468	No
52	76.8915	127.793	61.8	2470.66	Yes
52	76.8915	127.793	49.7	2369.37	Yes
52	76.8915	127.793	63	2470.66	Yes
52	76.8915	127.793	3.5	18.0678	No
52	76.8879	127.799	61.927	145.874	Yes
52	76.8879	127.799	62.088	149.169	Yes
52	76.8878	127.799	62.643	147.151	Yes
52	76.8882	127.799	62.428	165.6	Yes
52	76.8903	127.796	62.624	418.708	Yes
52	76.8912	127.795	61.997	986.256	Yes
52	76.8917	127.794	62.331	1615.64	Yes
52	76.8926	127.793	62.206	1066.55	Yes
52	76.8926	127.793	62.206	1066.55	Yes
52	76.8928	127.792	62.39	1383.41	Yes
52	76.8935	127.791	62.406	284.224	Yes
52	76.8938	127.791	63.023	229.419	Yes
52	76.8945	127.79	62.984	57.6589	Yes
52	76.8915	127.793	62.5	1966.16	Yes
53	76.895	127.818	62	513.638	Yes
53	76.895	127.818	49.9	218.896	Yes
53	76.895	127.818	2.9	15.1798	No
53	76.895	127.818	64.5	168.313	Yes
56	76.9985	128.234	72.8	105.319	Yes
56	76.9985	128.234	50.3	62.5784	Yes
56	76.9985	128.234	2.8	16.3519	No
58	77.2533	129.491	64.2	13.5051	Yes
58	77.2533	129.491	40	15.8001	Yes
58	77.2533	129.491	2	9.81098	No
73	72.0127	130.33	14.5	52.1382	Yes
73	72.0127	130.33	9.8	52.9595	Yes
73	72.0127	130.33	15.5	57.2957	Yes
73	72.0127	130.33	4.04	58.566	No
74	72.4845	130.425	12.4	90.2727	Yes
74	72.4845	130.425	8.1	128.05	Yes
74	72.4845	130.425	12	90.2727	Yes
74	72.4918	130.33	12	94.9033	Yes
74	72.4918	130.33	12	94.9033	Yes
74	72.4845	130.425	3.8	60.3143	No
75	72.4827	130.538	13	89.0857	Yes
75	72.4827	130.538	10	119.982	Yes
75	72.4827	130.538	13.5	54.234	Yes
75	72.4827	130.538	4	61.8923	No
76	73.1135	130.367	23.4	742.153	Yes
76	73.1135	130.367	9.9	372.629	Yes
76	73.1135	130.367	23.4	742.153	Yes
76	73.1135	130.367	21.5	1130.24	Yes
76	73.1135	130.367	4.1	113.044	No
76	73.1117	130.367	19.146	396.911	Yes
76	73.1121	130.366	20.232	527.389	Yes
76	73.1128	130.367	20.815	709.415	Yes
76	73.1133	130.367	20.763	542.966	Yes
76	73.1136	130.367	20.746	487.25	Yes
76	73.1136	130.367	22.416	470.634	Yes
76	73.1137	130.367	23.485	201.23	Yes
76	73.1137	130.367	23.696	785.663	Yes
76	73.1137	130.367	23.568	785.663	Yes
76	73.114	130.368	22.527	1720.1	Yes
76	73.1141	130.368	18.622	313.61	Yes
76	73.1142	130.368	19.722	284.457	Yes
76	73.1143	130.368	21.404	292.813	Yes
76	73.1144	130.368	21.345	297.242	Yes
76	73.1146	130.368	20.64	228.534	Yes
76	73.1149	130.368	19.677	266.474	Yes
76	73.1152	130.368	20.572	267.508	Yes
77	73.1122	130.356	20.6	350.474	Yes
77	73.1122	130.356	10.1	399.756	Yes
77	73.1122	130.356	20.6	350.474	Yes
77	73.1122	130.356	21.5	472.682	Yes
77	73.1122	130.356	3.7	177.58	No
78	73.0688	130.262	20.1	202.564	Yes
78	73.0688	130.262	13.4	235.262	Yes
78	73.0688	130.262	20.1	212.755	Yes
78	73.0688	130.262	3.6	110.328	No
78	73.0912	130.279	18.668	190.113	Yes
78	73.0917	130.279	19.739	271.913	Yes
78	73.0921	130.279	19.701	405.433	Yes
78	73.0924	130.278	19.701	563.358	Yes
78	73.0924	130.278	20.401	602.911	Yes
78	73.0925	130.278	20.72	712.874	Yes
78	73.0925	130.278	20.77	966.319	Yes
78	73.0925	130.278	21.136	966.319	Yes
78	73.0927	130.278	20.581	920.401	Yes
78	73.0928	130.278	20.494	793.877	Yes
78	73.0929	130.278	20.298	1236.17	Yes
78	73.093	130.278	20.771	813.935	Yes
78	73.0931	130.278	20.164	371.053	Yes
78	73.0933	130.278	20.042	395.623	Yes
78	73.0935	130.278	20.894	217.062	Yes
78	73.0938	130.278	20.082	253.234	Yes
78	73.094	130.277	19.272	228.705	Yes
80	73.9903	130.069	15.5	69.2728	Yes
80	73.9903	130.069	11	69.1288	Yes
80	73.9903	130.069	10.7	29.4078	Yes
80	73.9903	130.069	2.5	19.3062	No
81	74.5132	130.068	31.9	19.7425	Yes
81	74.5132	130.068	23.8	21.8449	Yes
81	74.5132	130.068	15.6	28.0212	Yes
81	74.5132	130.068	4.2	22.0032	No
83	75.0378	130.073	37.8	25.9037	Yes
83	75.0378	130.073	31.9	26.6177	Yes
83	75.0378	130.073	22.1	26.1691	Yes
83	75.0378	130.073	39.5	35.3572	Yes
83	75.0378	130.073	2.7	17.8501	No
84	75.5625	130.077	45	14.2591	Yes
84	75.5625	130.077	25.4	17.7921	Yes
84	75.5625	130.077	49.5	10.6192	Yes
84	75.5625	130.077	3.1	14.1386	No
85	76.0875	130.074	27.7	8.38663	Yes
85	76.0875	130.074	48.9	18.5088	Yes
85	76.0875	130.074	19.9	10.8495	Yes
85	76.0875	130.074	3.9	11.2336	No
86	76.6149	130.075	35.9	15.7069	Yes
86	76.6149	130.075	23.9	13.984	Yes
86	76.6149	130.075	61.5	15.6672	Yes
86	76.6149	130.075	3.9	12.1792	No
91	76.3943	125.422	48.2	327.202	Yes
91	76.3943	125.422	34.2	201.646	Yes
91	76.3943	125.422	24.2	205.587	Yes
91	76.3943	125.422	50.5	139.852	Yes
91	76.3943	125.422	4.5	17.9748	No
92	76.3923	125.428	47.6	109.885	Yes
92	76.3923	125.428	34.5	209.696	Yes
92	76.3923	125.428	24.9	59.8645	Yes
92	76.3923	125.428	17.9	49.4711	Yes
92	76.3923	125.428	12.5	43.6879	Yes
92	76.3923	125.428	3.9	49.3931	No

## Sheet: 16s rRNA
Sample	Station ID	Water depth (m)	Lat	Lon	Type I MOB (%)	Type II MOB (%)	Non-methanotrophic hopanoid producers (%)
AMK82-6947/1-2 cm	47	75	76.7756	125.825	4.33009		0.0147785
AMK82-6950/1-2 cm	50	70	76.8798	127.017	0.805571	0.169849	0.0121321
AMK82-6952/1-2 cm	52	63	76.8901	127.792	0.675873	0.0468137
AMK82-6973/1-2 cm	73	17	72.0115	130.326	0.286154	0.137065	0.473717
AMK82-6975/1-2 cm	75	13	72.4824	130.536		0.342381	1.13439
AMK82-6976/1-2 cm	76	25	73.1132	130.367	0.0704651	0.045299	0.198812
AMK82-6981/1-2 cm	81	34	74.5128	130.061	0.0218089	0.0529645	0.0218089
AMK82-6984/1-2 cm	84	61	75.5621	130.075	0.00687065	0.0366435	0.0641261
AMK82-6986/1-2 cm	86	65	76.615	130.073	0.00594071	0.0158419	0.00594071
AMK82-6991/1-2 cm	91	56	76.3949	125.421
AMK82-6992/1-2 cm	92	52	76.3943	125.427	0.0386806	0.111744	0.0386806

## Sheet: Hopanoid producers
Compound	Organism	Reference
Diploptene	Goniophlebium formosanum	LOTUS - the natural products occurrence database
Diploptene	Polypodium formosanum	LOTUS - the natural products occurrence database
Diploptene	Goniophlebium niponicum	LOTUS - the natural products occurrence database
Diploptene	Streptomyces collinus	LOTUS - the natural products occurrence database
Diploptene	Streptomyces filamentosus	LOTUS - the natural products occurrence database
Diploptene	Adiantum edgeworthii	LOTUS - the natural products occurrence database
Diploptene	Dryopteris crassirhizoma	LOTUS - the natural products occurrence database
Diploptene	Cheiropleuria bicuspis	LOTUS - the natural products occurrence database
Diploptene	Pyrrosia sheareri	LOTUS - the natural products occurrence database
Diploptene	Oleandra wallichii	LOTUS - the natural products occurrence database
Diploptene	Chromolaena laevigata	LOTUS - the natural products occurrence database
Diploptene	Salvia pubescens	LOTUS - the natural products occurrence database
Diploptene	Pyrrosia lingua	LOTUS - the natural products occurrence database
Diploptene	Plicanthus hirtellus	LOTUS - the natural products occurrence database
Diploptene	Drynaria fortunei	LOTUS - the natural products occurrence database
Diploptene	Crepis pulchra	LOTUS - the natural products occurrence database
Diploptene	Abietinella abietina	LOTUS - the natural products occurrence database
Diploptene	Phlebodium aureum	LOTUS - the natural products occurrence database
Diploptene	Alsophila spinulosa	LOTUS - the natural products occurrence database
Diploptene	Mikania decora	LOTUS - the natural products occurrence database
Diploptene	Dryopteris crassirhizoma	LOTUS - the natural products occurrence database
Diploptene	Diplopterygium glaucum	LOTUS - the natural products occurrence database
Diploptene	Gleichenia japonica	LOTUS - the natural products occurrence database
Diploptene	Pyrrosia lingua	LOTUS - the natural products occurrence database
Diploptene	Adiantum capillus-veneris	LOTUS - the natural products occurrence database
Diploptene	Wettsteinia inversa	LOTUS - the natural products occurrence database
Diploptene	Streptomyces thermocarboxydus	LOTUS - the natural products occurrence database
Diploptene	Pyrrosia petiolosa	LOTUS - the natural products occurrence database
Diploptene	Goniophlebium mengtzeense	LOTUS - the natural products occurrence database
Diploptene	Polypodium niponicum	LOTUS - the natural products occurrence database
Diploptene	Acanthus mollis	LOTUS - the natural products occurrence database
Diploptene	Davallia mariesii	LOTUS - the natural products occurrence database
Diploptene	Davallia trichomanoides	LOTUS - the natural products occurrence database
Diploptene	Frankia	LOTUS - the natural products occurrence database
Diploptene	Polypodium vulgare	LOTUS - the natural products occurrence database
Diploptene	Polypodium virginianum	LOTUS - the natural products occurrence database
Diploptene	Polypodium subpetiolatum	LOTUS - the natural products occurrence database
Hop-17(21)-ene	Goniophlebium niponicum	LOTUS - the natural products occurrence database
Hop-17(21)-ene	Goniophlebium formosanum	LOTUS - the natural products occurrence database
Hop-17(21)-ene	Zymomonas mobilis	LOTUS - the natural products occurrence database
Hop-17(21)-ene	Polypodium vulgare	LOTUS - the natural products occurrence database
Hop-17(21)-ene	Zymomonas mobilis	LOTUS - the natural products occurrence database
Hop-17(21)-ene	Colysis pothifolia	LOTUS - the natural products occurrence database
Hop-17(21)-ene	Polypodium niponicum	LOTUS - the natural products occurrence database
Hop-17(21)-ene	Frankia sp.	LOTUS - the natural products occurrence database
Hop-17(21)-ene	Polypodium subpetiolatum	LOTUS - the natural products occurrence database
Hop-17(21)-ene	Polypodium virginianum	LOTUS - the natural products occurrence database
Hop-17(21)-ene	Polypodium vulgare	LOTUS - the natural products occurrence database
Hop-17(21)-ene	Frankia	LOTUS - the natural products occurrence database
Hop-17(21)-ene	Davallia mariesii	LOTUS - the natural products occurrence database
Hop-17(21)-ene	Davallia trichomanoides	LOTUS - the natural products occurrence database
Hop-17(21)-ene	Acidobacterium capsulatum	Sinninghe Damsté et al., (2017)
Hop-17(21)-ene	Edaphobacter modestus	Sinninghe Damsté et al., (2017)
Hop-17(21)-ene	Acidobacteriaceae bacterium A2-4c	Sinninghe Damsté et al., (2017)
Hop-17(21)-ene	Acidicapsa borealis KA1	Sinninghe Damsté et al., (2017)
Hop-17(21)-ene	Acidicapsa ligni WH120	Sinninghe Damsté et al., (2017)
Hop-17(21)-ene	Ca. Koribacter versatilis Ellin345	Sinninghe Damsté et al., (2017)
Hop-17(21)-ene	Terriglobus roseus	Sinninghe Damsté et al., (2017)
Hop-17(21)-ene	Granulicella pectinivorans	Sinninghe Damsté et al., (2017)
Hop-17(21)-ene	Granulicella paludicola	Sinninghe Damsté et al., (2017)
Hop-17(21)-ene	Bryocella elongata	Sinninghe Damsté et al., (2017)
Hop-17(21)-ene	Telmatobacter sp.	Sinninghe Damsté et al., (2017)
Hop-17(21)-ene	Paludibacalum fermentans P105	Sinninghe Damsté et al., (2017)
Hop-17(21)-ene	Ca. Solibacter usitatus Ellin 6076	Sinninghe Damsté et al., (2017)
Hop-17(21)-ene	Bryobacter aggregatus	Sinninghe Damsté et al., (2017)
Diplopterol	Microgramma vaccinifolia	LOTUS - the natural products occurrence database
Diplopterol	Phlebodium aureum	LOTUS - the natural products occurrence database
Diplopterol	Asterella blumeana	LOTUS - the natural products occurrence database
Diplopterol	Azolla nilotica	LOTUS - the natural products occurrence database
Diplopterol	Acetobacter pasteurianus	LOTUS - the natural products occurrence database
Diplopterol	Adiantum capillus-veneris	LOTUS - the natural products occurrence database
Diplopterol	Adiantum raddianum	LOTUS - the natural products occurrence database
Diplopterol	Adiantum edgeworthii	LOTUS - the natural products occurrence database
Diplopterol	Adiantum pedatum	LOTUS - the natural products occurrence database
Diplopterol	Oeosporangium kuhnii	LOTUS - the natural products occurrence database
Diplopterol	Asterella angusta	LOTUS - the natural products occurrence database
Diplopterol	Cheiropleuria bicuspis	LOTUS - the natural products occurrence database
Diplopterol	Alsophila lepifera	LOTUS - the natural products occurrence database
Diplopterol	Cyathea lepifera	LOTUS - the natural products occurrence database
Diplopterol	Davallia mariesii	LOTUS - the natural products occurrence database
Diplopterol	Dryopteris crassirhizoma	LOTUS - the natural products occurrence database
Diplopterol	Fossombronia alaskana	LOTUS - the natural products occurrence database
Diplopterol	Fossombronia pusilla	LOTUS - the natural products occurrence database
Diplopterol	Lophosoria quadripinnata	LOTUS - the natural products occurrence database
Diplopterol	Oleandra wallichii	LOTUS - the natural products occurrence database
Diplopterol	Plagiochasma rupestre	LOTUS - the natural products occurrence database
Diplopterol	Plagiogyria glauca	LOTUS - the natural products occurrence database
Diplopterol	Lepisorus contortus	LOTUS - the natural products occurrence database
Diplopterol	Lindsaea trichomanoides	LOTUS - the natural products occurrence database
Diplopterol	Alsophila gigantea	LOTUS - the natural products occurrence database
Diplopterol	Davallia bullata	LOTUS - the natural products occurrence database
Diplopterol	Davallia trichomanoides	LOTUS - the natural products occurrence database
Diplopterol	Goniophlebium formosanum	LOTUS - the natural products occurrence database
Diplopterol	Goniophlebium niponicum	LOTUS - the natural products occurrence database
Diplopterol	Alsophila spinulosa	LOTUS - the natural products occurrence database
Diplopterol	Adiantum abscissum	LOTUS - the natural products occurrence database
Diploptene	Nostoc muscorum	LOTUS - the natural products occurrence database
Diploptene	Adiantum capillus-veneris	LOTUS - the natural products occurrence database
Diploptene	Oeosporangium kuhnii	LOTUS - the natural products occurrence database
Diploptene	Cheiropleuria bicuspis	LOTUS - the natural products occurrence database
Diploptene	Davallia mariesii	LOTUS - the natural products occurrence database
Diploptene	Dryopteris crassirhizoma	LOTUS - the natural products occurrence database
Diploptene	Gleichenia japonica	LOTUS - the natural products occurrence database
Diploptene	Microgramma vaccinifolia	LOTUS - the natural products occurrence database
Diploptene	Oleandra wallichii	LOTUS - the natural products occurrence database
Diploptene	Phlebodium aureum	LOTUS - the natural products occurrence database
Diploptene	Serpocaulon menisciifolium	LOTUS - the natural products occurrence database
Diploptene	Polypodium subpetiolatum	LOTUS - the natural products occurrence database
Diploptene	Polypodium vulgare	LOTUS - the natural products occurrence database
Diploptene	Pyrrosia petiolosa	LOTUS - the natural products occurrence database
Diploptene	Wettsteinia inversa	LOTUS - the natural products occurrence database
Diploptene	Abietinella abietina	LOTUS - the natural products occurrence database
Diploptene	Goniophlebium mengtzeense	LOTUS - the natural products occurrence database
Diploptene	Pyrrosia lingua	LOTUS - the natural products occurrence database
Diploptene	Frankia	LOTUS - the natural products occurrence database
Diploptene	Floribundaria aurea	LOTUS - the natural products occurrence database
Diploptene	Streptomyces thermocarboxydus	LOTUS - the natural products occurrence database
Diploptene	Streptomyces filamentosus	LOTUS - the natural products occurrence database
Diploptene	Streptomyces collinus	LOTUS - the natural products occurrence database
Diploptene	Plicanthus hirtellus	LOTUS - the natural products occurrence database
Diploptene	Davallia bullata	LOTUS - the natural products occurrence database
Diploptene	Davallia trichomanoides	LOTUS - the natural products occurrence database
Diploptene	Goniophlebium formosanum	LOTUS - the natural products occurrence database
Diploptene	Polypodium virginianum	LOTUS - the natural products occurrence database
Diploptene	Diplopterygium glaucum	LOTUS - the natural products occurrence database
Diploptene	Goniophlebium niponicum	LOTUS - the natural products occurrence database
Diploptene	Alsophila spinulosa	LOTUS - the natural products occurrence database
Diploptene	Sphingomonas sp	Sohlenkamp and Geiger., (2015)
Diploptene	Bradyrhizobium diazoefficiens	Sohlenkamp and Geiger., (2015)
Diploptene	Rhodopseudomonas palustris	Sohlenkamp and Geiger., (2015)
Diploptene	Burkholderia cenocepacia	Sohlenkamp and Geiger., (2015)
Diploptene	Acidithiobacillus ferroxidans	Sohlenkamp and Geiger., (2015)
Diploptene	Desulfovibrio sp.	Sohlenkamp and Geiger., (2015)
Diploptene	Synechocystis sp. PCC 6803	Sohlenkamp and Geiger., (2015)
Diploptene	Nocardia sp.	Sohlenkamp and Geiger., (2015)
Diploptene	Singulisphaera acidiphila	Sohlenkamp and Geiger., (2015)
Diploptene	Streptomyces coelicolor	Sohlenkamp and Geiger., (2015)
